# Supplementary material for: Systematic analysis of the unique band gap modulation of mixed halide perovskites
Source: Royal Society of Chemistry journal article supplement (doi:10.1039/c5cp05982h), 2016-01-01
Supplement: c5cp05982h1.pdf [file c5cp05982h1.pdf]

# Supporting Information

for

## Systematic Analysis of Unique Band Gap Modulation of Mixed Halide Perovskites

*Jongseob Kim<sup>†</sup>, Sung-Hoon Lee,<sup>§</sup> Choong-Heui Chung<sup>‡</sup>, and Ki-Ha Hong<sup>\*‡</sup>*

<sup>†</sup>Samsung Advanced Institute of Technology, Samsung Electronics Co., Ltd. Yongin-Si,  
Gyeonggi-Do, 446-712, Korea

<sup>§</sup> Center for Artificial Low Dimensional Electronic Systems, Institute for Basic Science,  
Pohang 790-784, Korea

<sup>‡</sup> Department of Materials Science and Engineering, Hanbat National University, 125  
Dongseo-daero, Yuseong-Gu, Daejeon, 305-719, Korea

Email: [kiha.hong@hanbat.ac.kr](mailto:kiha.hong@hanbat.ac.kr)

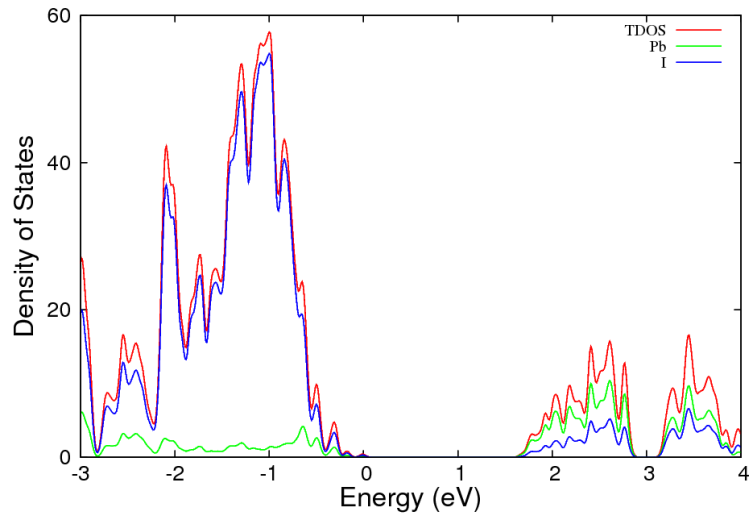

DOS of CH<sub>3</sub>NH<sub>3</sub>PbI<sub>3</sub>

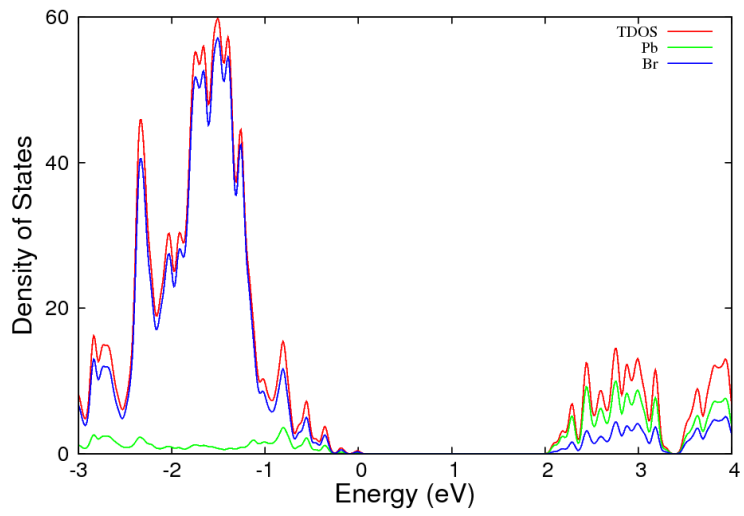

DOS of CH<sub>3</sub>NH<sub>3</sub>PbBr<sub>3</sub>

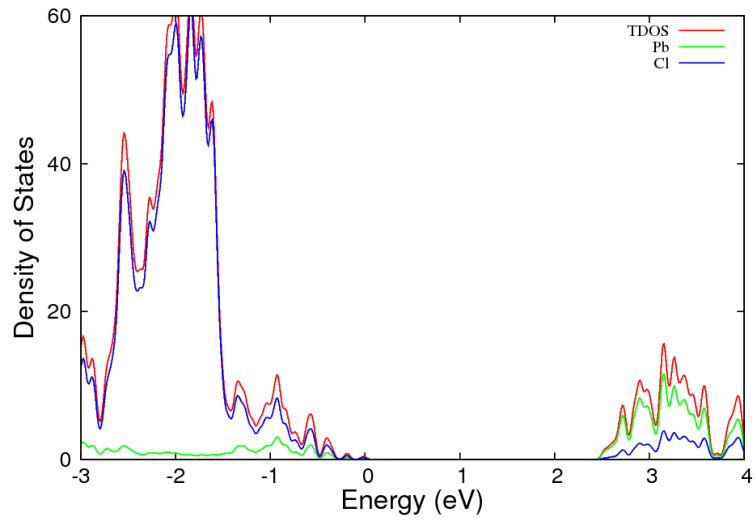

DOS of  $\text{CH}_3\text{NH}_3\text{PbCl}_3$

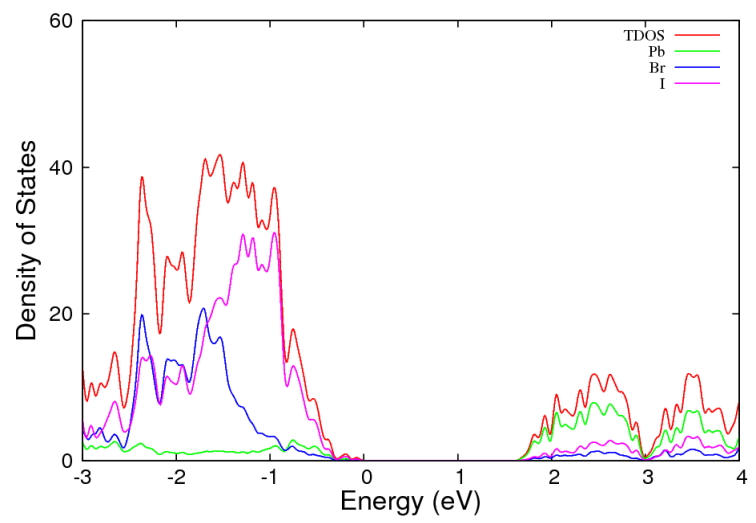

DOS of  $\text{CH}_3\text{NH}_3\text{PbI}_2\text{Br}$

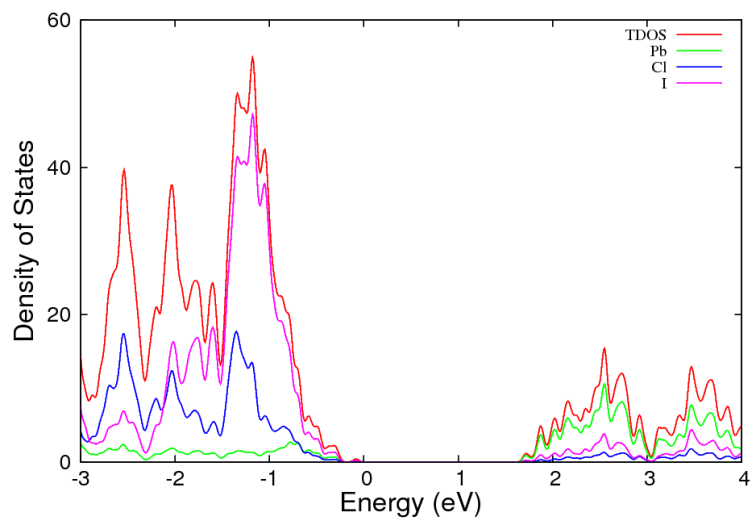

DOS of CH<sub>3</sub>NH<sub>3</sub>PbI<sub>2</sub>Cl
